# Supplementary material for: Increasing Incidence of Testicular Germ Cell Tumors among Racial/Ethnic Minorities in the United States
Source: Oxford University Press journal article supplement (doi:10.1158/1055-9965.epi-20-0107), 2020-05-08
Supplement: 10559965epi200107-sup-236019_3_supp_6152286_q70tw7.xlsx [file 10559965epi200107-sup-236019_3_supp_6152286_q70tw7.xlsx]

## Sheet: Sheet1
Supplementary Table 1. Trends in TGCT incidence by histologic subtype,USCS registries, 2001-2016
		Testicular germ cell tumors			Seminoma			Nonseminoma			Spermatocytic tumors
State	Population	Count	Rate (95% CI)	APC	Count	Rate (95% CI)	APC	Count	Rate (95% CI)	APC	Count	Rate (95% CI)	APC	Notes
Alabama	36393517	1475	4.21 (4.00-4.43)	0.06	852	2.46 (2.30-2.63)	0.24	612	1.72 (1.59-1.86)	-0.33	^	^	†
Alaska	5781439	345	5.82 (5.21-6.48)	-0.58	191	3.30 (2.84-3.82)	†	148	2.40 (2.03-2.83)	^	^	^	†
Arizona	49237895	2501	5.18 (4.98-5.39)	-0.23	1360	2.90 (2.74-3.06)	-1.48*	1121	2.24 (2.11-2.38)	1.51*	20	0.04 (0.03-0.06)	†
Arkansas	22457138	947	4.43 (4.15-4.72)	1.69*	580	2.76 (2.53-2.99)	1.90*	363	1.65 (1.49-1.83)	^	^	^	†
California	293505074	16646	5.47 (5.39-5.56)	1.20*	9054	3.05 (2.99-3.11)	0.67*	7488	2.39 (2.33-2.44)	1.97*	104	0.04 (0.03-0.05)	†	One significant joinpoint for nonseminoma: (2001-2006: 4.15*, 2006-2016: 1.27*)
Colorado	39637190	2358	5.74 (5.51-5.97)	-0.47	1305	3.21 (3.04-3.40)	-0.8	1042	2.49 (2.34-2.65)	-0.07	^	^	†	One significant joinpoint for nonseminoma: (2001-2005: 9.03, 2005-2016: -1.88*)
Connecticut	27579694	1617	6.11 (5.81-6.42)	0.65	960	3.60 (3.37-3.83)	0.89	648	2.48 (2.29-2.68)	0.23	^	^	†
Delaware	6825779	325	4.96 (4.43-5.53)	†	177	2.76 (2.36-3.20)	†	143	2.14 (1.80-2.52)	†	^	^	†
District of Columbia	4585742	234	4.31 (3.76-4.92)	†	137	2.61 (2.18-3.10)	†	96	1.68 (1.35-2.07)	†	^	^	†
Florida	145051224	6521	4.74 (4.63-4.86)	-0.86*	3752	2.74 (2.65-2.83)	-1.00*	2703	1.96 (1.89-2.04)	-0.58	66	0.04 (0.03-0.05)	†
Georgia	73764635	2993	4.00 (3.85-4.14)	0.25	1697	2.30 (2.20-2.42)	-0.67	1271	1.66 (1.57-1.75)	1.51*	25	0.04 (0.02-0.05)	†
Hawaii	10734295	566	5.27(4.84-5.73)	2.07*	327	3.08 (2.76-3.44)	†	236	2.16 (1.89-2.45)	†	^	^	†
Idaho	12141537	750	6.53 (6.06-7.02)	1.25	450	4.03 (3.66-4.42)	0.95	295	2.45 (2.17-2.75)	†	^	^	†
Illinois	99933000	5516	5.52 (5.37-5.66)	1.48*	3143	3.19 (3.08-3.31)	0.99*	2323	2.27 (2.18-2.37)	2.22*	50	0.05 (0.04-0.07)	†
Indiana	50445170	2699	5.52 (5.31-5.73)	0.76	1541	3.20 (3.04-3.37)	0.73	1140	2.28 (2.15-2.41)	0.91	18	0.04 (0.02-0.06)	†
Iowa	23927633	1505	6.66 (6.33-7.01)	0.15	882	3.98 (3.72-4.26)	0.1	616	2.65 (2.44-2.87)	0.12	^	^	†
Kansas	22332039	1234	5.71 (5.40-6.04)	1.94*	698	3.32 (3.07-3.57)	2.93*	527	2.36 (2.16-2.57)	0.78	^	^	†
Kentucky	33636869	1717	5.20 (4.96-5.46)	1.00*	964	2.95 (2.76-3.14)	0.48	736	2.20 (2.05-2.37)	1.84*	17	0.05 (0.03-0.08)	†	Two significant joinpoints for nonseminoma: (2001-2004: -3.71, 2004-2009: 7.29*, 2009-2016: -1.46)
Louisiana	35337730	1505	4.37 (4.15-4.60)	0.22	886	2.62 (2.45-2.80)	-0.28	604	1.70 (1.57-1.85)	0.81	^	^	†
Maine	10334106	616	6.51 (6.00-7.05)	0.8	367	3.84 (3.45-4.26)	†	243	2.63 (2.31-2.98)	†	^	^	†
Maryland	44299399	1900	4.32 (4.13-4.52)	-0.01	1108	2.53 (2.38-2.68)	-0.11	783	1.77 (1.65-1.90)	-0.05	^	^	†
Massachusetts	50701783	3079	6.08 (5.87-6.30)	-0.71	1857	3.69 (3.53-3.87)	-0.26	1204	2.35 (2.22-2.49)	-1.49	18	0.04 (0.02-0.06)	†	Two significant joinpoints for seminoma: (2001-2010: -0.61, 2010-2014: 4.88, 2014-2016: -22.06*)
Michigan	78242940	4211	5.63 (5.46-5.81)	0.07	2471	3.33 (3.20-3.47)	-0.49	1711	2.26 (2.15-2.37)	0.73	29	0.04 (0.03-0.06)	†
Minnesota	41740527	2826	6.89 (6.63-7.15)	-0.16	1679	4.12 (3.93-4.33)	-0.73	1130	2.72 (2.57-2.89)	0.66	17	0.04 (0.02-0.06)	†
Mississippi	20016734	686	3.59 (3.33-3.88)	†	389	2.09 (1.89-2.32)	†	293	1.48 (1.31-1.66)	†	^	^	†
Missouri	46219296	2249	5.07 (4.86-5.29)	0.39	1249	2.86 (2.70-3.02)	0.45	984	2.18 (2.04-2.32)	0.22	16	0.03 (0.02-0.06)	†
Montana	7810048	482	6.68 (6.09-7.31)	1.24	281	3.95 (3.49-4.45)	†	195	2.66 (2.30-3.06)	†	^	^	†
Nebraska	14355210	917	6.60 (6.18-7.05)	0.15	501	3.68 (3.37-4.02)	-0.27	410	2.88 (2.60-3.17)	0.76	^	^	†
Nevada	20901722	985	4.66 (4.38-4.97)	0.65	548	2.59 (2.37-2.81)	0.96	429	2.04 (1.85-2.25)	†	^	^	†
New Hampshire	10325033	690	7.07 (6.54-7.62)	0.74	411	4.17 (3.77-4.60)	0.31	274	2.85 (2.52-3.22)	†	^	^	†
New Jersey	68185424	3820	5.69 (5.51-5.87)	-0.03	2253	3.34 (3.20-3.48)	-0.34	1543	2.32 (2.20-2.44)	0.47	24	0.04 (0.02-0.05)	†
New Mexico	15785137	925	6.13 (5.74-6.54)	0.57	513	3.51 (3.21-3.83)	-0.42	408	2.59 (2.34-2.86)	1.93	^	^	†
New York	150068534	8379	5.55 (5.43-5.67)	0.97*	4897	3.29 (3.20-3.38)	0.43	3401	2.21 (2.14-2.29)	1.77*	81	0.05 (0.04-0.07)	†	One significant joinpoint for testicular germ cell tumors: (2001-2008: 2.76*, 2008-2016: -0.44)
North Carolina	72175844	3428	4.80 (4.64-4.96)	0.39	1962	2.78 (2.66-2.91)	-0.22	1444	1.98 (1.88-2.09)	1.29	22	0.03 (0.02-0.05)	†
North Dakota	5497154	343	6.30 (5.64-7.02)	†	183	3.53 (3.03-4.09)	†	160	2.77 (2.35-3.24)	†	^	^	†
Ohio	89892771	4720	5.50 (5.34-5.66)	0.21	2722	3.20 (3.08-3.32)	-0.02	1954	2.26 (2.16-2.36)	0.54	44	0.05 (0.04-0.07)	†
Oklahoma	29199730	1397	4.94 (4.68-5.20)	1.11	787	2.85 (2.66-3.06)	0.56	601	2.06 (1.89-2.23)	1.88	^	^	†
Oregon	29843793	1943	6.61 (6.32-6.92)	-0.33	1135	3.89 (3.67-4.13)	-1.03	792	2.67 (2.49-2.86)	0.47	16	0.05 (0.03-0.08)	†
Pennsylvania	98144558	5957	6.38 (6.21-6.54)	0.64	3502	3.77 (3.64-3.89)	0.34	2407	2.56 (2.46-2.67)	1.03	48	0.05 (0.03-0.06)	†
Rhode Island	8187099	493	6.17 (5.64-6.75)	0.51	280	3.56 (3.15-4.01)	†	209	2.56 (2.22-2.93)	†	^	^	†
South Carolina	35098670	1360	4.01 (3.79-4.23)	0.85	767	2.30 (2.14-2.47)	0.95	585	1.68 (1.55-1.82)	0.44	^	^	†
South Dakota	6448231	371	6.21 (5.59-6.88)	-0.76	222	3.81 (3.32-4.35)	†	148	2.39 (2.01-2.81)	†	^	^	†
Tennessee	48548410	2227	4.69 (4.50-4.89)	1.81*	1267	2.69 (2.54-2.84)	0.96	943	1.96 (1.84-2.09)	2.75*	17	0.04 (0.02-0.06)	†
Texas	194684148	9205	4.61 (4.52-4.71)	0.02	4942	2.55 (2.48-2.63)	-0.6	4214	2.03 (1.97-2.09)	0.95*	49	0.03 (0.02-0.04)	†	Two significant joinpoints for seminoma: (2001-2007: 1.41, 2007-2010: -6.24, 2010-2016: 1.90*)
Utah	21423949	1483	6.92 (6.57-7.30)	0.03	825	4.11 (3.83-4.40)	-0.57	649	2.76 (2.55-2.99)	0.78	^	^	†
Vermont	4905119	310	6.66 (5.92-7.45)	†	181	3.90 (3.34-4.52)	†	125	2.69 (2.23-3.21)	†	^	^	†
Virginia	61738741	2724	4.37 (4.21-4.54)	-0.82	1597	2.59 (2.46-2.72)	-1.23	1111	1.75 (1.65-1.86)	-0.25	16	0.03 (0.01-0.04)	†	One significant joinpoint for testicular germ cell tumors: (2001-2005: 7.38*, 2005-2016: -2.53*) One significant joinpoint for seminoma: (2001-2005: 11.86*, 2005-2016: -3.82*)
Washington	52589001	3455	6.50 (6.29-6.72)	0.42	1985	3.77 (3.61-3.95)	-0.01	1446	2.68 (2.54-2.82)	0.99	24	0.05 (0.03-0.07)	†
West Virginia	14429710	719	5.29 (4.91-5.69)	0.84	421	3.11 (2.82-3.43)	0.46	285	2.10 (1.86-2.35)	†	^	^	†
Wisconsin	44658393	2941	6.81 (6.57-7.07)	0.54	1752	4.09 (3.90-4.29)	0.26	1167	2.68 (2.53-2.84)	0.99	22	0.05 (0.03-0.07)	†
Wyoming	4439848	280	6.57 (5.81-7.39)	†	161	3.84 (3.26-4.49)	†	116	2.67 (2.20-3.21)	†	^	^	†
APC: Annual Percent Change
CI: Confidence Interval
^ - Case counts less than 16 (rate could not be calculated)
† - The APC could not be calculated
* - The APC is significantly different from zero (p<0.05)
